# Supplementary material
Source: Research Square preprint supplement (doi:10.21203/rs.3.rs-9136850/v1)
Supplement: Supplementary file 1 [file 5b7f8973118e7f564e8fc343.docx]

**Microbiome structure of wild banana rhizosphere soils with potential to suppress Fusarium wilt pathogen**

Bappa Karmakar 1, Rajappa Janyanaik Joga 2, Akoijam Ratankumar Singh 3, Ramie Husneara Begum 1*

1 Department of Life Science and Bioinformatics, Assam University, Assam 782462, India

2 Division of Natural Resource Management, Indian Council of Agricultural Research for North-Eastern Hill Region, Meghalaya 793103, India

3 Division of Crop Science, Indian Council of Agricultural Research for North-Eastern Hill Region, Meghalaya 793103, India

***** Corresponding author: *E-mail address*:[ramie.h.begum@aus.ac.in](mailto:ramie.h.begum@aus.ac.in)

**Table S1** Physicochemical properties of the collected wild banana rhizosphere soil samples

| Sample Id | Clay  (g kg−1) | Sand  (g kg−1) | Silt  (g kg−1) | pH | EC  (dS m−1) | Moisture (%) | TOC  (g C kg−1) | AP  (mg kg−1) | AS  (mg kg−1) | | AAN  (mg kg−1) | |
| --- | --- | --- | --- | --- | --- | --- | --- | --- | --- | --- | --- | --- |
| AUDC-02 | 480 | 280 | 240 | 7.2 | 0.11 | 15.8 | 19.4 | 275.7 | 0.04 | 0.03 | |
| AUDC-03 | 570 | 270 | 160 | 5.3 | 0.11 | 10.8 | 14.7 | 11 | 0.05 | 0.06 | |
| AUDC-04 | 210 | 590 | 200 | 8.2 | 0.14 | 8.6 | 16.7 | 130.2 | 0.01 | 0.02 | |
| AUDC-05 | 0 | 840 | 160 | 8.3 | 0.44 | 5.5 | 11.4 | 120 | 0.06 | 0.01 | |
| AUDC-07 | 240 | 640 | 120 | 5.6 | 0.03 | 10.9 | 9.3 | 29.9 | 0.01 | 0.05 | |
| AUDC-09 | 320 | 480 | 200 | 7.0 | 0.07 | 5.9 | 9.1 | 55.6 | 0.12 | 0.05 | |
| AUDC-012 | 440 | 520 | 40 | 7.6 | 0.12 | 9.5 | 11.3 | 33.5 | 0.02 | 0.05 | |
| AUDC-014 | 190 | 610 | 200 | 7.3 | 0.59 | 16.9 | 20.1 | 1832 | 0.01 | 0.06 | |
| AUDC-015 | 310 | 380 | 310 | 4.5 | 0.08 | 12.6 | 17.6 | 46.3 | 0.03 | 0.08 | |
| AUDC-017 | 160 | 760 | 80 | 8.2 | 0.44 | 20.7 | 15.9 | 732.7 | 0.05 | 0.10 | |
| AUDC-019 | 560 | 320 | 120 | 6.8 | 0.33 | 13.3 | 22.8 | 67.5 | 0.02 | 0.01 | |
| AUDC-020 | 290 | 710 | 0 | 8.1 | 0.28 | 5.5 | 12.7 | 68.1 | 0.00 | 0.03 | |
| AUDC-023 | 430 | 410 | 160 | 6.9 | 0.16 | 13.4 | 6.8 | 23.4 | 0.03 | 0.03 | |
| AUDC-024 | 320 | 380 | 300 | 6.6 | 0.52 | 18.3 | 15.3 | 366.4 | 0.26 | 0.08 | |
| AUDC-026 | 470 | 370 | 160 | 7.1 | 0.18 | 11.4 | 7.8 | 93.2 | 0.04 | 0.03 | |
| AUDC-032 | 40 | 460 | 500 | 5.6 | 0.05 | 12.1 | 13.6 | 98.7 | 0.02 | 0.06 | |
| AUDC-033 | 150 | 650 | 200 | 4.5 | 0.29 | 6.6 | 12.7 | 717 | 0.05 | 0.10 | |
| AUDC-035 | 300 | 700 | 0 | 5.2 | 0.07 | 8.7 | 11.8 | 161.4 | 0.02 | 0.09 | |
| AUDC-036 | 190 | 730 | 80 | 6.5 | 0.04 | 5.6 | 7.8 | 203.5 | 0.03 | 0.07 | |
| AUDC-038 | 410 | 550 | 40 | 5.3 | 0.11 | 11.2 | 7.2 | 260.1 | 0.01 | 0.08 | |

**Table S2** Results of in vitro screening of *Fusarium oxysporum* f. sp. *cubense* mycelia growth suppression on solid and aqueous medium.

| Sample ID | Solid medium (cm) | Liquid medium (OD) |
| --- | --- | --- |
| AUDC-01 | 0.65 | 0.107 |
| AUDC-02 | 1.02 | 0.089 |
| AUDC-03 | 1.39 | 0.084 |
| AUDC-04 | 0.26 | 0.119 |
| AUDC-05 | 1.39 | 0.074 |
| AUDC-06 | 1.01 | 0.091 |
| AUDC-07 | 1.85 | 0.083 |
| AUDC-08 | 1.57 | 0.100 |
| AUDC-09 | 0.17 | 0.12 |
| AUDC-010 | 0.17 | 0.098 |
| AUDC-011 | 1.01 | 0.093 |
| AUDC-012 | 1.4 | 0.080 |
| AUDC-013 | 1.32 | 0.091 |
| AUDC-014 | 1.4 | 0.081 |
| AUDC-015 | 1.81 | 0.079 |
| AUDC-016 | 1.25 | 0.094 |
| AUDC-017 | 1.9 | 0.077 |
| AUDC-018 | 1.48 | 0.095 |
| AUDC-019 | 1.23 | 0.083 |
| AUDC-020 | 0.06 | 0.102 |
| AUDC-021 | 1.2 | 0.117 |
| AUDC-022 | 1.17 | 0.112 |
| AUDC-023 | 1.45 | 0.089 |
| AUDC-024 | 0.66 | 0.114 |
| AUDC-025 | 0.25 | 0.105 |
| AUDC-026 | 0.12 | 0.107 |
| AUDC-027 | 0.72 | 0.102 |
| AUDC-028 | 0.35 | 0.100 |
| AUDC-029 | 0.75 | 0.110 |
| AUDC-030 | 0.39 | 0.101 |
| AUDC-031 | 0.77 | 0.094 |
| AUDC-032 | 0.26 | 0.116 |
| AUDC-033 | 0.75 | 0.129 |
| AUDC-034 | 0.91 | 0.099 |
| AUDC-035 | 0.78 | 0.127 |
| AUDC-036 | 0.34 | 0.107 |
| AUDC-037 | 1.09 | 0.111 |
| AUDC-038 | 0.85 | 0.110 |
| AUDC-039 | 0.85 | 0.102 |
| AUDC-040 | 0.73 | 0.110 |
| AUDC-041 | 1.05 | 0.112 |

**Table S3** Summary of raw sequence data.

| Sample ID | No. of reads | Read length |
| --- | --- | --- |
| PSS | 47718490 | 150 |
| PnSS | 42520618 | 150 |

**Table S4** Summary of annotated contigs.

| Sample ID | Total contigs | Assigned taxa | Unclassified |
| --- | --- | --- | --- |
| PSS | 378024 | 269878 | 108146 |
| PnSS | 262410 | 217897 | 44513 |
|  | | |  |

**Table S5** Summary of taxonomic distribution of the annotated contigs.

| Sample ID | Archaea | Bacteria | Fungi | Viruses |
| --- | --- | --- | --- | --- |
| PSS | 1552 | 206287 | 6824 | 392 |
| PnSS | 1838 | 182531 | 4481 | 1571 |
|  | | | | |
